# Supplementary material for: Integrated Biomarker Responses Reveal Cypermethrin-Induced Stress and Organ Damage in Nile Tilapia: Insights into Hepatic, Neural, and Hematological Toxicity
Source: Research Square preprint supplement (doi:10.21203/rs.3.rs-7200428/v1), 2025-08-29
Supplement: Supplementary file 1 [file 0842cdaa1471ff58b43a5074.docx]

**To whom it may concern**

This is to certify that Animal Welfare and Experimental Ethics Committee, Bangladesh Agricultural University, Mymensingh 2202, Bangladesh has approved the experimental procedures and treatments used in the research entitled “Integrated Biomarker Responses Reveal Cypermethrin-Induced Stress and Organ Damage in Nile Tilapia: Insights into Hepatic, Neural, and Hematological Toxicity ” (AWEEC/BAU/2023, 18).

**Kazi Rafiqul Islam**

Chairman

AWEEC, BAU

Mymensingh-2202

Bangladesh
