# Supplementary material for: Integrated Biomarker Responses Reveal Cypermethrin-Induced Stress and Organ Damage in Nile Tilapia: Insights into Hepatic, Neural, and Hematological Toxicity
Source: Research Square preprint supplement (doi:10.21203/rs.3.rs-7200428/v1), 2025-08-29
Supplement: Supplementary file 2 [file 3254b03bf4500284da4eddea.docx]

**Highlight**

- Cypermethrin exposure, even short-term exposure, caused substantial changes in hematology, antioxidants, liver and nerve enzymes, highlighting the peroxidative damage in digestive glands and gills by the pesticide.
- Elevation in white blood cell (WBC) count and glucose levels suggested a stress response that leads to the activation of the immune system. Reduction in Mean cell volume (MCV) and mean cell hemoglobin (MCH) in pesticide-treated fish suggests impaired erythropoiesis. Morphological changes in erythrocytes were identified, indicating cellular damage, perhaps resulting from oxidative stress or direct toxicity due to cypermethrin.
- Fish exposed to cypermethrin showed structural alterations in their vital organs, which can serve as biomarkers of environmental contamination and stress. Alteration in the liver indicated metabolic disruption. Intestinal damage reflected compromised digestion and absorption capabilities.
- Significant inhibition of AChE indicates not only that the organism has been exposed but also that an enough amount of the pollutants has reached the target region to elicit a physiological impact, as demonstrated by the current investigation. Total antioxidant capacity reflects the cumulative action of all antioxidants present, including enzymatic and non-enzymatic defenses, in counteracting oxidative stress.
- Elevation of ALT, AST, and AKP enzymes indicates degeneration changes and hypofunction of the liver due to the toxicant's effects on the hepatocytes. The result is supported by the histological study of the liver.
